# Supplementary figures and images for: Utilization of Agricultural Waste for the Production of Xylooligosaccharides Using Response Surface Methodology and Their In Vitro Prebiotic Efficacy
Source: Research Square preprint supplement (doi:10.21203/rs.3.rs-748907/v1), 2021-09-10

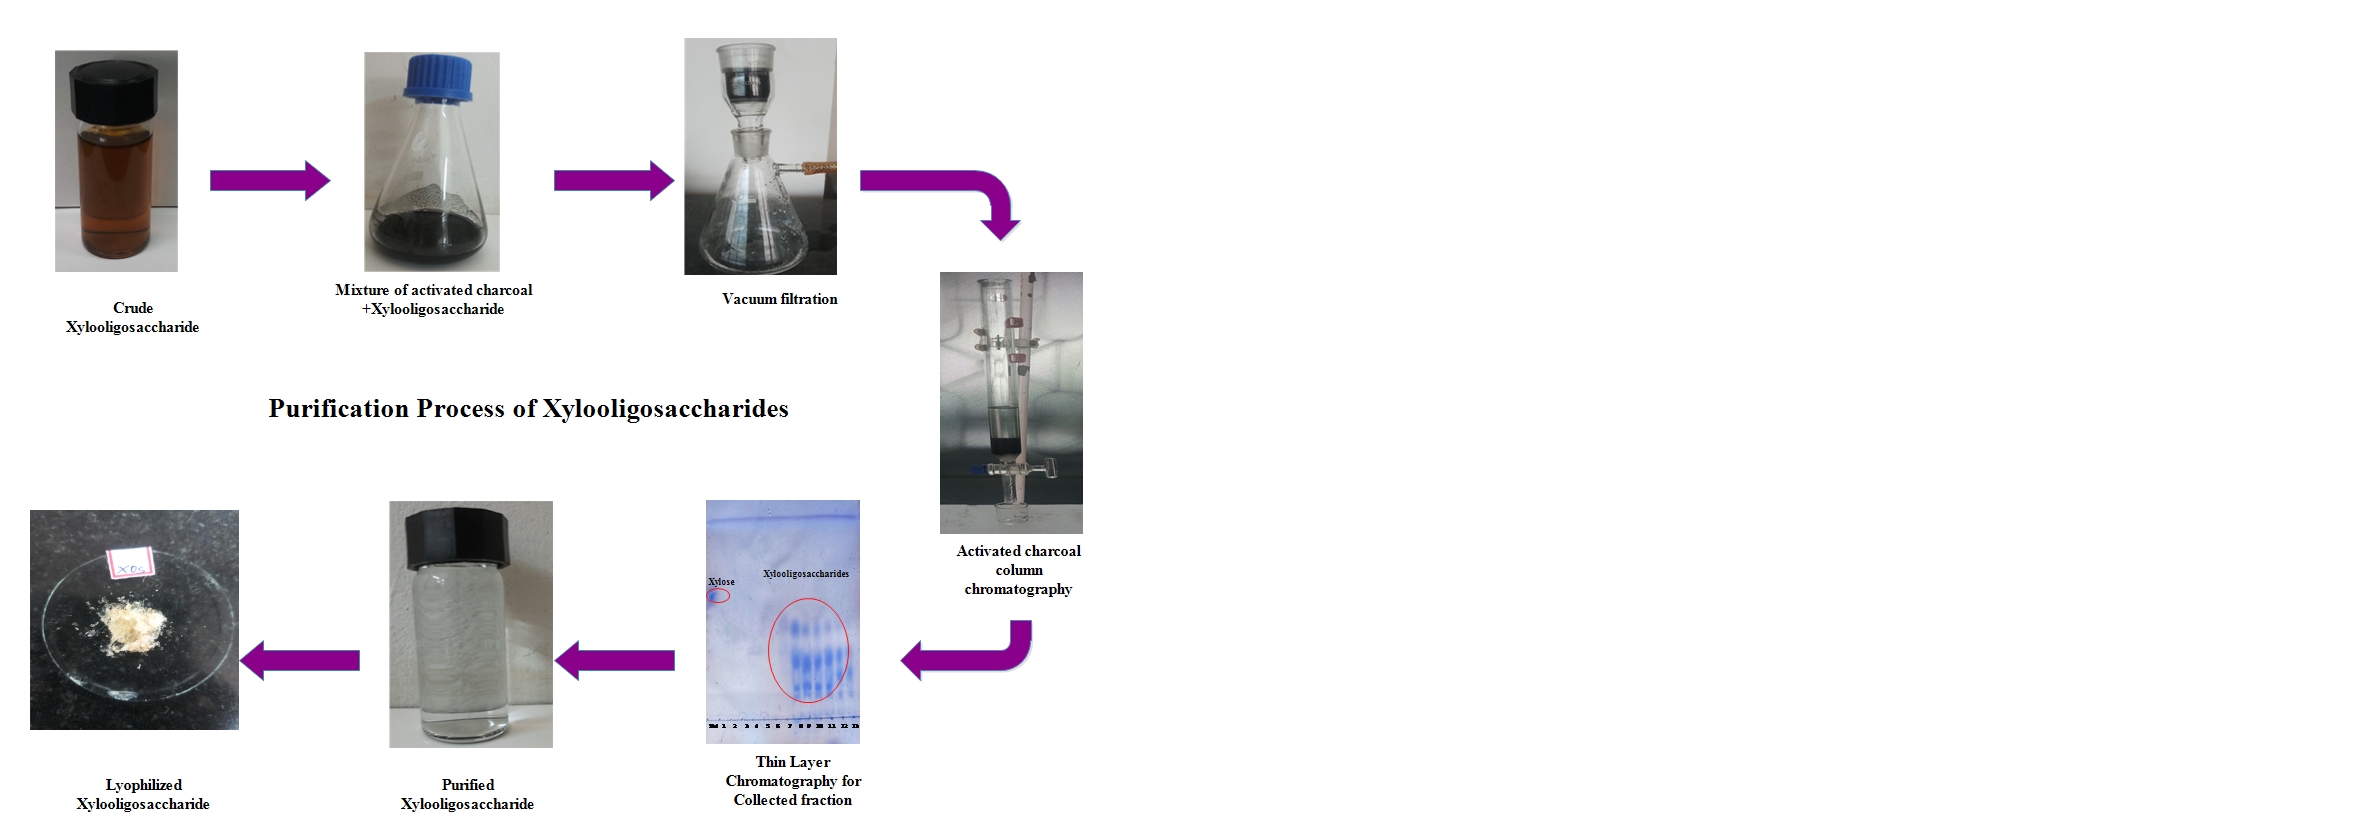

Supplement: Supplementary file 1 [file 4256786bb766389f83bb8e0e.docx]
